1 **Tetrapods on the EDGE: Overcoming data limitations to identify phylogenetic**  
2 **conservation priorities**

3

4 Rikki Gumbs<sup>1,2\*</sup>, Claudia L. Gray<sup>2</sup>, Oliver R. Wearn<sup>2,3</sup>, Nisha R. Owen<sup>2</sup>

5

6 <sup>1</sup> Science and Solutions for a Changing Planet DTP, and the Department of Life Sciences, Imperial  
7 College London, Silwood Park Campus, Ascot, Berkshire, United Kingdom

8 <sup>2</sup> EDGE of Existence Programme, Zoological Society of London, Regent's Park, London

9 <sup>3</sup>Institute of Zoology, Zoological Society of London, Regent's Park, London

10

11 \* Corresponding author

12 E-mail: [r.gumbs@imperial.ac.uk](mailto:r.gumbs@imperial.ac.uk) (RG)

## 13 **Abstract**

14 The scale of the ongoing biodiversity crisis requires both effective conservation prioritisation and urgent  
15 action. The EDGE metric, which prioritises species based on their Evolutionary Distinctiveness (ED)  
16 and Global Endangerment (GE), relies on adequate phylogenetic and extinction risk data to generate  
17 meaningful priorities for conservation. However, comprehensive phylogenetic analyses of large clades  
18 are extremely rare and, even when available, become quickly out-of-date due to the rapid rate of species  
19 descriptions and taxonomic revisions. Thus, it is important that conservationists can use the available  
20 data to incorporate evolutionary history into conservation prioritisation. We compared published and  
21 new methods to impute ED for species missing from a phylogeny whilst simultaneously correcting the  
22 ED scores of their close taxonomic relatives. We found that following artificial removal of species from  
23 a phylogeny, the new method provided the closest estimates of their “true” score, differing from the  
24 true ED score by an average of less than 1%, compared to the 31% and 38% difference of the previous  
25 imputation methods. Previous methods also substantially under- and over-estimated scores as more  
26 species were artificially removed from a phylogeny. We therefore used the new method to estimate ED  
27 scores for all tetrapods. From these scores we updated EDGE prioritisation rankings for all tetrapod  
28 species with IUCN Red List assessments, including the first EDGE prioritisation for reptiles. Further,  
29 we identified criteria to identify robust priority species in an effort to further inform conservation action  
30 whilst limiting uncertainty and anticipating future phylogenetic advances.

## 31 **Introduction**

32 We are currently in a period of unprecedented human-mediated biodiversity loss, often termed the ‘sixth  
33 mass extinction’ [1]. To achieve global commitments to halt the loss of biodiversity [2], the resources  
34 available for conservation must be targeted effectively. Several species-level conservation prioritisation  
35 schemes [3] have been developed, focussing on ‘charismatic’ species [4,5], threat levels [6], important  
36 ecosystem service providers [7], or some combination of these [8–11].

37 However, very few—if any—of these approaches explicitly focus on preserving unique evolutionary  
38 history, or Phylogenetic Diversity (PD) [12–14]. Species with few extant close relatives represent a  
39 disproportionate amount of the total PD of their clade [15]. Where these species are threatened with  
40 extinction, they often represent a significant amount of important trait diversity that could soon be lost  
41 [16,17]. Therefore, current conservation prioritisation approaches that do not take PD into consideration  
42 may fail to prevent the loss of large amounts of both phylogenetic and trait diversity [13,17–19]. To  
43 date, several metrics have been proposed to integrate PD into the prioritisation of species and regions  
44 [12,15,20–23].

45 A number of these metrics measure the contribution of individual species to the total PD of a clade [24–  
46 29], and the Evolutionary Distinctiveness (ED) metric has received the most widespread use  
47 [12,14,15,30–35]. Whereas PD is the sum of all branch lengths of a phylogeny, ED is the proportion of  
48 the total PD assigned to an individual species, with the length of each branch of the phylogeny divided  
49 equally amongst all species to which it is ancestral (see original formulation [12] for detailed  
50 description). This partitioning of PD amongst species facilitates prioritisation at the species, rather than  
51 clade, level.

52 In conjunction with PD prioritisation, conservation actions must also be timely. Many species are at  
53 imminent risk of extinction, and those that are under greatest threat are widely considered to be the  
54 highest priority for immediate action. The EDGE metric, which combines the ED of a species with its  
55 extinction risk—or ‘Global Endangerment’ (GE) [12], has been implemented by the EDGE of Existence  
56 programme at the Zoological Society of London to prioritise species in a number of taxonomic groups

57 (mammals [12,19], amphibians [30], birds [15], and corals [36]). The EDGE of Existence programme  
58 is the only global conservation initiative to focus on threatened species representing a significant  
59 amount of unique evolutionary history, raising awareness of these often poorly known species, and  
60 actively supporting conservation activities [37]. Research has shown the EDGE metric has the potential  
61 to not only preserve more PD than expected [17], but also preserve more trait diversity than expected if  
62 conserving threatened species without considering PD [16,17].

63 However, meaningful and credible prioritisation for conservation depends on the quality of data  
64 available. Metrics such as ED ideally require species-level phylogenies to calculate the individual  
65 contribution of each species to the total PD of a clade [12,32], yet no phylogeny exists that contains all  
66 known species of any tetrapod class. There are little, if any, genetic data available for many poorly-  
67 known species, precluding their inclusion in most phylogenetic analyses. In addition, given the high  
68 rate of tetrapod species descriptions, species-level phylogenies quickly become out of date; for example,  
69 almost 400 species were missing from the mammalian supertree [38] less than four years following  
70 publication [19]. Even though the exact phylogenetic position of these “missing species” is not known,  
71 in most cases they can be assigned to genus or family [36,39,40]. This provides an opportunity for their  
72 ED scores to be estimated based on the ED scores of congeneric or confamilial species.

73 The phylogenies currently available also have notable limitations. Of the tetrapods (amphibians, birds,  
74 mammals and reptiles), amphibians and testudines suffer from particularly poor phylogenetic coverage  
75 [41–44], reflecting the relatively low research investment in these taxa compared to birds and mammals  
76 [45–47]. For example, at the time of writing the largest published amphibian genetic phylogeny [41]  
77 omits more than 3,600 species (50% of known species). Recent species-level phylogenies published for  
78 birds [48], mammals [38,49,50], and squamates [35] represent advances in phylogenetic coverage for  
79 these groups, but many species are still missing (~1,000 birds, ~500 mammals, ~200 squamates  
80 respectively). To overcome paucity of genetic data, many phylogenies are now constructed using  
81 taxonomic information and constraints to infer phylogenetic relationships for species lacking available  
82 genetic data [40,48,51]. Such phylogenies are inherently uncertain and therefore produce a large  
83 distribution of equiprobable phylogenetic trees, rather than a single consensus phylogeny, in order to

84 capture the uncertainty around taxonomically-inferred relationships [40,51]. This reliance on taxonomic  
85 data means existing phylogenies are susceptible to significant changes with more comprehensive  
86 genetic sampling [40,50,51].

87 The uncertainty in available phylogenies must be accounted for and acknowledged when developing  
88 conservation priorities. Given the imminent biodiversity crisis [1], it is impractical and undesirable for  
89 conservationists to wait for completely inclusive phylogenies to be published before implementing PD-  
90 based conservation efforts [19]. We therefore required a reliable method for incorporating all known  
91 species when using incomplete or out-of-date phylogenies.

92 Two statistical imputation methods have previously been employed to calculate ED for species missing  
93 from phylogenies [12,19,36], though the relative performance of these methods has not yet been  
94 examined. Here, we compare the accuracy of both of the existing imputation methods with that of a  
95 third, novel method. We show empirically that the ED, and also EDGE rank, of missing species can be  
96 accurately predicted from other species in the phylogeny using our new method. This produces a robust  
97 set of priority species, and deals effectively with the uncertainty inherent in phylogenetic data. Finally,  
98 we use the statistical imputation of ED scores to produce updated EDGE priority lists for all tetrapods,  
99 including the first EDGE list for reptiles.

## 100 **Materials and methods**

### 101 **Imputation of Evolutionary Distinctiveness for missing species**

102 Isaac et al.'s [12] method of imputing ED scores for missing species (hereafter the 'original' imputation  
103 method) reduced the ED scores of species in the phylogeny in proportion to the number of missing  
104 congeners or confamilials, and assigned the difference in ED scores between the original and corrected  
105 values for each species present in the phylogeny evenly across the missing species. This reduction of  
106 ED scores for species with missing congeners or confamilials replicates an inherent characteristic of  
107 ED calculations: the amount of ED received from an internal branch is inversely proportional to the  
108 number of descendant species [12]. However, as this method shares existing ED from species present  
109 in the phylogeny amongst the missing relatives without adding new ED to the phylogeny, it fails to  
110 replicate a second inherent characteristic of ED calculation: the addition of species with non-zero  
111 terminal branch lengths will invariably increase the total ED (= PD) of the clade, which would be  
112 expected with the inclusion of additional, missing, species [12].

113 Conversely, Curnick et al. [36] followed Swenson [39] by calculating the mean ED values for genera  
114 and families in the phylogeny and assigning this score to missing congeners and family members  
115 (hereafter the 'simple' imputation method). This imputation provides the opposite result of the 'original'  
116 imputation: though it does increase the PD of the clade with the inclusion of missing species, the simple  
117 method fails to reduce the ED scores of the closely-related species present in the phylogeny from which  
118 the scores are imputed.

119 We employed a novel method to estimate ED for missing species that both corrects the ED score of  
120 species present in the phylogeny and increases the PD of the clade. First, we calculated ED scores for  
121 all missing species using the 'simple' imputation method. Second, for genera with missing species and  
122 families with missing genera, we calculated the total ED for the associated species present in the  
123 phylogeny and divided this equally amongst all congeners or congeners, including those missing from  
124 the phylogeny. Each species now had two ED scores. For species in families with no species missing  
125 from the phylogeny, the two ED scores were identical. We then calculated the mean of the two values

126 to derive an ED score that both increases the total PD of the clade upon inclusion of missing species  
127 and corrects the ED of species with missing relatives.

128 To assess the performance of the three imputation methods we took available dated consensus  
129 phylogenies for three tetrapod clades; amphibians [41], mammals [49], and squamates [52]. To simulate  
130 the imputation of ED scores from phylogenies that accurately represent all higher-level relationships  
131 but do not contain all species within a genus or genera within a family (e.g. [41,52,53]), we followed  
132 four steps for each phylogeny: 1) a 'reference' ED score for all species was calculated from the unaltered  
133 phylogeny; 2) a random number of species were removed from each genus in the phylogeny, from one  
134 species to the whole genus; 3) ED scores for the remaining species were calculated from the phylogeny;  
135 and 4) ED scores of removed species were imputed from their remaining congeners or confamilials  
136 using each of the three methods. All four steps were repeated 100 times for each of the reference  
137 phylogenies. We ran linear regressions to test how well the ED scores from each of the three imputation  
138 methods predicted the reference ED scores.

139 To examine how the imputation methods performed when progressively fewer congeners and  
140 confamilials were present in the phylogeny, we also calculated the proportion of the reference ED  
141 captured by each imputation method (i.e. imputed ED divided by reference ED) for all simulations. We  
142 then ran linear regressions of the proportion of reference ED captured by each imputation method  
143 against the proportion of that species' genus or family retained in the phylogeny at the point of  
144 imputation. Under ideal performance of the imputation method, we would expect the slope of the  
145 regression line to be 0 (i.e. no change in proportion of reference ED predicted) and for most of the  
146 points to lie on a horizontal line at  $y = 1$  (i.e. 1:1 proportion of imputed ED and reference ED).

147 During our test of imputation methods, Tonini et al. published a distribution of 10,000 species-level  
148 squamate phylogenies [35] (with 9,755 species; ~98% of species at time of its publication). In  
149 comparison to the 4,161-species (~45% complete) phylogeny of Zheng and Wiens [52], this allowed us  
150 to assess how the imputation methods perform when the phylogeny on which they are based is  
151 superseded. We used the most accurate of the three imputation methods to calculate ED values for all

152 squamate species, based on the older phylogeny of Zheng and Wiens [52]. We then used a linear  
153 regression to test how well these imputed values predicted the median ED values from Tonini et al.'s  
154 [35] distribution of 10,000 species-level phylogenies [35]. We use the median across all 10,000  
155 phylogenies as ED was not normally distributed.

156 We also compared EDGE rankings obtained from the imputed ED scores from Zheng and Wiens [52]  
157 with EDGE rankings derived from the median ED scores from the 10,000 phylogenies of Tonini et al.  
158 [35] for all species with non-Data Deficient IUCN Red List assessments and recognised in the Reptile  
159 Database [54] (3,966 species). We compared these EDGE rankings using linear regression. This  
160 allowed us to explore the stability of squamate EDGE rankings in the face of changes in available  
161 phylogenetic data.

## 162 **Identifying phylogenetic conservation priorities in the face of** 163 **uncertainty**

164 There are multiple competing phylogenies for each taxonomic group, and new phylogenies are  
165 continually being refined. We therefore need a prioritisation method that highlights a robust set of  
166 species on which to focus our efforts, where “robust” means least likely to experience a shift in ED  
167 score with future alterations to the phylogeny. We thus used the most accurate of the three imputation  
168 methods, in conjunction with published time-calibrated phylogenies for each clade, to calculate ED  
169 scores and EDGE prioritisation rankings for four groups: amphibians, birds, mammals, and reptiles.  
170 Extinct and invalid species (i.e. those not recognised by the taxonomic authorities adopted here  
171 [6,53,56,58,59]) were removed from each phylogeny prior to the calculation of ED to ensure it was not  
172 underestimated.

173 As reptiles are paraphyletic with the omission of birds, and no complete reptilian phylogeny exists, ED  
174 scores were calculated for the three reptilian orders from separate phylogenies. For crocodylians, ED  
175 values were calculated from Shirley et al.'s 2014 phylogeny [55]. For testudines, ED scores were  
176 calculated from Hedges et al.'s 2015 ‘megaphylogeny’ [42] cropped to the root of the testudine clade.  
177 Though two alternative phylogenies were available for testudines [43,44], one includes numerous



178 extinct species and taxonomic discrepancies [44], while the other is not time-calibrated [43], which is  
179 essential for calculating ED scores.

180 For squamates, a distribution of 10,000 ED values were generated from Tonini et al.'s [35] 10,000  
181 phylogenies, from which we took the median score for each species. We followed the taxonomy of the  
182 Reptile Database as of 15/04/2016 [54]. After calculating ED and EDGE scores separately for  
183 testudines, crocodylians and squamates we applied the 'EDGE species' criteria to each clade  
184 individually (species must be above median ED of their clade and be in a 'threatened' IUCN Red List  
185 Category (Vulnerable and above) to be considered EDGE species [12]), then combined all three groups  
186 of 'EDGE species' to identify the top 100 ranking EDGE species for reptiles as a whole.

187 For amphibians, ED values were generated from Pyron's 2014 phylogeny [41] and imputed for all  
188 species absent from the phylogeny using the best performing imputation method. Our taxonomy  
189 followed Frost's Amphibian Species of the World as of 01/02/2016 [56].

190 We calculated a distribution of 100 ED values for all mammal species, including those missing from  
191 the phylogeny, using Kuhn et al.'s [57] open access sample of 100 fully-resolved mammal phylogenies,  
192 and used the median ED value to generate EDGE scores. We did not use the recently published mammal  
193 phylogeny of Faurby & Svenning [50] to calculate ED scores as their phylogeny was constructed by  
194 prioritising topology over branch length accuracy [50], the latter being critical for ED calculation. We  
195 followed IUCN Red List taxonomy for all assessed mammal species and, for species absent from the  
196 Red List taxonomy, we referred to Wilson and Reeder [58].

197 We followed Collen et al. [19] by substituting imputed ED scores for published divergence time  
198 estimates for two highly distinct species comprising monotypic genera that are absent from the  
199 phylogeny (*Laonastes aenigmamus* and *Pseudoryx nghetinhensis*; see S2 dataset for scores and  
200 references). We included *P. nghetinhensis* in the calculation of Bovine ED scores to ensure we  
201 controlled for all missing species in the family. The use of the divergence times for these species, or  
202 their 'terminal branch length', can be considered a conservative estimate of their 'true' ED, as terminal  
203 branch lengths are the minimum guaranteed contribution to the ED score of any species [11,19,27].

204 For birds we calculated ED scores from the revised distribution of phylogenies of Jetz et al. [15], from  
205 which we imputed ED for missing species using the best performing method. We followed the  
206 taxonomy of BirdLife International's taxonomic checklist 8.0 [59] and removed invalid species from  
207 the phylogeny before calculating ED.

208 We aimed to identify 'robust' high priority species in an EDGE framework; those which, in the absence  
209 of changes in 'GE' (i.e. IUCN status) or taxonomic inflation, are likely to remain high priority species  
210 irrespective of improved phylogenetic coverage. Depending on the nature of the phylogenetic data, the  
211 mechanism for identifying these 'robust' high priority EDGE species varied. For mammals, birds and  
212 squamates, for which ED was calculated from a distribution of relatively (>90%) complete phylogenies,  
213 we consider species which are present in the top 100 ranks across all phylogenies in the distribution as  
214 robust priority EDGE species. These are species that are invariably high-ranking when incorporating  
215 the available phylogenetic uncertainty.

216 However, as ED for amphibians, crocodylians and testudines was calculated from single consensus  
217 phylogenies with a large proportion of missing species (>20%), we developed separate criteria for  
218 identifying robust priority EDGE species. We assumed robust priority EDGE species to be top 100-  
219 ranked species for which all congeners or—for monospecific genera—confamilials are present in the  
220 respective phylogeny. These are the cases with minimal uncertainty, for which no ED scores in the  
221 genera (or family) were imputed; they would only change if new species were described. The ED, and  
222 therefore EDGE, scores for these species are least likely to change with increased genetic coverage  
223 (assuming the absence of changes in 'GE'). This assumption is supported by analyses presented in S1  
224 Text.

## 225 Results

### 226 Imputation of Evolutionary Distinctiveness for missing species

227 For all three imputation methods ('original', 'simple' and 'new'), imputed ED scores of species  
228 removed from phylogenies were significant predictors of the reference ED score when imputing at a  
229 genus level (all  $p < 0.001$ ) and family level (all  $p < 0.001$ ) for all three phylogenies (models were run  
230 separately for each taxonomic group, see Table 1). Of the three imputation methods, the imputed ED  
231 scores calculated using the new method captured substantially more of the variance in the reference ED  
232 scores (variance explained increased by an average of 59% compared to the original method, and 9%  
233 compared to the simple method; Table 1).

234

235 **Table 1. Results from linear regression of imputed ED scores against reference ED scores for each species from the**  
236 **full phylogenies, using three imputation methods.**

| Imputation<br>method | <i>Adjusted R</i> <sup>2</sup><br>(amphibians) | d.f.   | p      | <i>Adjusted R</i> <sup>2</sup><br>(mammals) | d.f.   | p      | <i>Adjusted R</i> <sup>2</sup><br>(reptiles) | d.f.   | p      |
|----------------------|------------------------------------------------|--------|--------|---------------------------------------------|--------|--------|----------------------------------------------|--------|--------|
| Original             | 0.2607                                         | 322697 | <0.001 | 0.4332                                      | 479772 | <0.001 | 0.3808                                       | 410683 | <0.001 |
| Simple               | 0.4231                                         | 322697 | <0.001 | 0.5589                                      | 479772 | <0.001 | 0.5419                                       | 410683 | <0.001 |
| New                  | 0.4941                                         | 322697 | <0.001 | 0.5699                                      | 479772 | <0.001 | 0.5899                                       | 410683 | <0.001 |

237

238

239 Regressing the proportion of the reference ED captured by the imputed ED against the proportion of  
240 each genus—or family—remaining in the phylogeny also indicated that our new imputation method is  
241 the most accurate (with most of the points centring around the  $y = 1$  line; Fig 1), irrespective of the  
242 proportion of the phylogeny (as indicated by the zero slope; Fig 1). In this case we ran the model on  
243 data from all taxonomic groups combined, to be able to easily obtain a visual comparison of the slope  
244 and intercept of the models. Across all taxonomic groups combined, the new method overestimated  
245 reference ED scores by an average of 0.8% when imputed from congeners, and underestimated ED  
246 scores by an average of 0.2% when imputed from confamilials. Underestimation increased when ED

247 scores were imputed using the original method to an average of 31.3% when imputed from congeners,  
248 and 47.8% when imputed from confamilials. The simple method overestimated ED by an average of  
249 38% when imputed from congeners and 39.1% when imputed from confamilials. Thus, we implemented  
250 our new method when imputing ED values for missing species in all further analyses.

251 We then assessed the performance of imputed ED scores for squamates generated from the 4,161  
252 species phylogeny of Zheng and Wiens [52] as predictors of the median ED scores from the newer  
253 distribution of 10,000 phylogenies of Tonini et al. [35]. We found that the imputed ED scores were a  
254 significant predictor of the median ED values generated for each species from the distribution of  
255 phylogenies (Adjusted  $R^2 = 0.5698$ , d.f. = 9,576,  $p < 0.0001$ ; Fig 2A). EDGE rankings from imputed  
256 ED scores were also a strong predictor of EDGE rankings from the median ED of the newer distribution  
257 of 10,000 phylogenies (Adjusted  $R^2 = 0.8228$ , d.f. = 3,964,  $p < 0.0001$ ; Fig 2B). Seventy-three of the  
258 top 100 EDGE-ranked squamate species identified using the median ED scores from the newer Tonini  
259 et al. [35] phylogeny were also in the top 100 EDGE ranking species using imputed ED scores from the  
260 phylogeny of Zheng and Wiens [52]. Of the top 50 EDGE ranking species using the median ED scores,  
261 44 were returned in the top 100 EDGE ranks using the imputed ED scores.

## 262 **Identifying robust phylogenetic conservation priorities in the face** 263 **of uncertainty**

264 We used available phylogenies and the novel imputation method to estimate ED scores for all 33,781  
265 species of amphibians, birds, mammals and reptiles known as of February 2016 (Fig 3). When combined  
266 with available IUCN Red List assessments, we estimated the EDGE rankings for 23,387 tetrapod  
267 species (~69% of described species; Table 2 and Fig 3; all ED and EDGE scores in S2 Dataset).

268

269

270 **Table 2. Species richness, number of species with EDGE scores, median, maximum and total ED (in millions of years,**  
271 **MY) estimated for all tetrapod groups.**

| Clade                | No. of species<br>(as of<br>01/02/2016) | No. of<br>imputed<br>species | No. of<br>species<br>with<br>EDGE<br>scores | Median ED<br>(MY) | Total ED<br>(MY) | Maximum<br>ED (MY) |
|----------------------|-----------------------------------------|------------------------------|---------------------------------------------|-------------------|------------------|--------------------|
| Amphibians           | 7,488                                   | 4,213                        | 4,615                                       | 16.4              | 133,412          | 191.0              |
| Birds                | 10,451                                  | 458                          | 10,218                                      | 5.9               | 78,162           | 72.8               |
| Mammals              | 5,451                                   | 536                          | 4,619                                       | 7.5               | 47,943           | 89.5               |
| Reptiles             | 10,391                                  | 502                          | 4,205                                       | 11.3              | 131,044          | 242.9              |
| <b>All tetrapods</b> | <b>33,781</b>                           | <b>5,709</b>                 | <b>23,657</b>                               | <b>8.0</b>        | <b>390,561</b>   | <b>242.9</b>       |

272

273 We estimated the first ED values for all 10,391 reptiles and the first EDGE scores for the 4,205 reptile  
274 species with non-Data Deficient IUCN Red List assessments. 9,889 species were present across the  
275 three phylogenies used to calculate ED values for reptiles, with the scores for the remaining 502 species  
276 imputed from related species present in the phylogenies.

277 Testudines have a higher median ED (31.0) than crocodylians (13.4) and squamates (11.1). The reptile—  
278 and tetrapod—with the highest ED is the tuatara (*Sphenodon punctatus*; median ED = 242.9); classified  
279 as Least Concern by the IUCN. 29 of the top 100 EDGE reptiles are testudines, 68 are squamates, and  
280 three are crocodylians. The highest ranked EDGE testudine, reptile, and tetrapod is *Erymnochelys*  
281 *madagascariensis*, a critically endangered freshwater turtle endemic to Madagascar, which we estimate  
282 to have an ED of 96.8 and an EDGE score of 7.35. The highest ranked EDGE squamate is *Xenotyphlops*  
283 *grandidieri*, a Critically Endangered blind snake from Madagascar, with a median ED of 67.7 and an  
284 EDGE score of 7.00. The Critically Endangered Chinese alligator (*Alligator sinensis*) is the highest  
285 ranked EDGE crocodylian, with an ED of 41.7 and an EDGE score of 6.53.

286 Pyron's (2014) amphibian phylogeny included 3,275 valid amphibian species (~43% of described  
287 species), from which ED values for a further 4,213 species were imputed to give scores for 7,488 species  
288 in total. EDGE scores were then calculated for 4,615 species with non-Data Deficient IUCN Red List  
289 assessments. From our estimates, the amphibian with the highest ED is the Mexican burrowing toad  
290 (*Rhinophrynus dorsalis*; ED = 191.0). We estimate the top ranking EDGE amphibians to be the  
291 Critically Endangered Archey's frog (*Leiopelma archeyi*) endemic to New Zealand (ED = 62.8, EDGE  
292 = 6.92) and the Chinese giant salamander (*Andrias davidianus*; ED = 61.2, EDGE = 6.90).

293 For mammals, the distribution of trees from Kuhn et al. 2011 [57] were modified to contain 4,915 valid  
294 and extant mammal species (90% of recognised mammal species). ED values were imputed for 536  
295 species to give ED scores for a total of 5,451 recognised species and EDGE scores for 4,619 with non-  
296 Data Deficient Red List assessments. The armadillo (*Dasypus novaeboracensis*; median ED = 89.45) and duck-  
297 billed platypus (*Ornithorhynchus anatinus*; median ED = 89.25) have the highest mammalian ED  
298 scores. The highest ranked EDGE mammals are the Critically Endangered long-beaked echidnas of  
299 New Guinea: *Zaglossus attenboroughi* and *Zaglossus bruijnii* (ED = 46.56, EDGE = 6.63 for both  
300 species).

301 We imputed ED scores for 458 species of birds that have been described or reclassified since the  
302 publication of the phylogeny used by Jetz et al. [15], producing a total of 10,451 birds with ED scores.  
303 We estimate a lower median ED (5.9) than Jetz et al. (6.2; [15]) due to the inclusion of a large number  
304 of imputed species with low ED (median ED of imputed species = 5.7). The bird with the highest ED  
305 remains the oilbird (*Steatornis caripensis*; median ED = 72.8), and the highest ranked EDGE bird  
306 remains the giant ibis (*Thaumatibis gigantea*; median ED = 37.9, EDGE = 6.43).

307 We identified 19 of the 100 highest ranking EDGE reptiles to be robust priority species: 10 testudines,  
308 2 crocodylians, and 7 squamates (Table 3). Only 14 of the top 100 EDGE amphibians are considered  
309 robust priority species and 15 of the top 100 EDGE bird species (Table 3). However, 78 of the top 100  
310 EDGE mammal species were deemed robust priority species (the top 20 of these are shown in Table 3  
311 and all 78 in S2 Dataset). All ED and EDGE scores from this analysis are available as supplementary

312 material (S2 Dataset) and annually updated ED and EDGE scores will be available for download at  
 313 [www.edgeofexistence.org](http://www.edgeofexistence.org) from 2018.

314

315 **Table 3. Robust top-100 EDGE species for tetrapods with IUCN Red List assessments.**

| Species                              | Estimated ED | Red List category | EDGE score |
|--------------------------------------|--------------|-------------------|------------|
| <b>Amphibians</b>                    |              |                   |            |
| <i>Leiopelma archeyi</i>             | 62.80        | CR                | 6.92       |
| <i>Andrias davidianus</i>            | 61.18        | CR                | 6.90       |
| <i>Nasikabatrachus sahyadrensis</i>  | 107.28       | EN                | 6.76       |
| <i>Sechellophryne pipilodryas</i>    | 51.84        | CR                | 6.73       |
| <i>Sooglossus thomasseti</i>         | 50.86        | CR                | 6.72       |
| <i>Insuetophrynus acarpicus</i>      | 40.42        | CR                | 6.49       |
| <i>Balebreviceps hillmani</i>        | 36.17        | CR                | 6.38       |
| <i>Bradytriton silus</i>             | 31.90        | CR                | 6.26       |
| <i>Barbourula kalimantanensis</i>    | 62.75        | EN                | 6.23       |
| <i>Sechellophryne gardineri</i>      | 51.84        | EN                | 6.04       |
| <i>Sooglossus sechellensis</i>       | 50.86        | EN                | 6.02       |
| <i>Parvimolge townsendi</i>          | 24.38        | CR                | 6.00       |
| <i>Phytotriades auratus</i>          | 22.24        | CR                | 5.91       |
| <i>Melanobatrachus indicus</i>       | 42.44        | EN                | 5.85       |
| <b>Testudines</b>                    |              |                   |            |
| <i>Erymnochelys madagascariensis</i> | 96.78        | CR                | 7.35       |
| <i>Dermatemys mawii</i>              | 78.69        | CR                | 7.15       |
| <i>Eretmochelys imbricata</i>        | 41.44        | CR                | 6.52       |
| <i>Platysternon megacephalum</i>     | 74.57        | EN                | 6.40       |
| <i>Carettochelys insculpta</i>       | 149.69       | VU                | 6.40       |
| <i>Chelonia mydas</i>                | 48.72        | EN                | 5.98       |
| <i>Peltocephalus dumerilianus</i>    | 96.78        | VU                | 5.96       |
| <i>Podocnemis lewyana</i>            | 39.45        | EN                | 5.77       |

|                                     |        |    |      |
|-------------------------------------|--------|----|------|
| <i>Palea steindachneri</i>          | 36.22  | EN | 5.69 |
| <i>Dermodochelys coriacea</i>       | 61.68  | VU | 5.52 |
| <b>Crocodylians</b>                 |        |    |      |
| <i>Gavialis gangeticus</i>          | 34.04  | CR | 6.33 |
| <i>Mecistops cataphractus</i>       | 26.47  | CR | 6.09 |
| <b>Squamates</b>                    |        |    |      |
| <i>Xenotyphlops grandidieri</i>     | 67.66  | CR | 7.00 |
| <i>Shinisaurus crocodilurus</i>     | 103.42 | EN | 6.73 |
| <i>Casarea dussumieri</i>           | 70.89  | EN | 6.35 |
| <i>Oedodera marmorata</i>           | 23.58  | CR | 5.97 |
| <i>Uroplatus guentheri</i>          | 38.38  | EN | 5.75 |
| <i>Uroplatus malahelo</i>           | 38.13  | EN | 5.74 |
| <i>Paragehyra gabriellae</i>        | 34.34  | EN | 5.64 |
| <b>Mammals</b>                      |        |    |      |
| <i>Zaglossus attenboroughi</i>      | 46.56  | CR | 6.63 |
| <i>Zaglossus bruijnii</i>           | 46.56  | CR | 6.63 |
| <i>Zaglossus bartoni</i>            | 45.01  | CR | 6.60 |
| <i>Mystacina robusta</i>            | 41.38  | CR | 6.51 |
| <i>Lipotes vexillifer</i>           | 39.23  | CR | 6.46 |
| <i>Burramys parvus</i>              | 34.65  | CR | 6.34 |
| <i>Solenodon cubanus</i>            | 61.53  | EN | 6.21 |
| <i>Solenodon paradoxus</i>          | 61.53  | EN | 6.21 |
| <i>Dicerorhinus sumatrensis</i>     | 30.02  | CR | 6.20 |
| <i>Diceros bicornis</i>             | 27.73  | CR | 6.13 |
| <i>Lasiorhinus krefftii</i>         | 26.19  | CR | 6.07 |
| <i>Rhinoceros sondaicus</i>         | 25.32  | CR | 6.04 |
| <i>Platanista gangetica</i>         | 50.03  | EN | 6.01 |
| <i>Camelus ferus</i>                | 24.25  | CR | 6.00 |
| <i>Manis pentadactyla</i>           | 20.68  | CR | 5.84 |
| <i>Manis javanica</i>               | 20.68  | CR | 5.84 |
| <i>Daubentonia madagascariensis</i> | 41.88  | EN | 5.83 |
| <i>Elephas maximus</i>              | 39.66  | EN | 5.78 |



|                                 |       |    |      |
|---------------------------------|-------|----|------|
| <i>Ailurus fulgens</i>          | 39.41 | EN | 5.77 |
| <i>Bradypus pygmaeus</i>        | 18.99 | CR | 5.76 |
| <b>Birds</b>                    |       |    |      |
| <i>Thaumatibis gigantea</i>     | 37.96 | CR | 6.44 |
| <i>Aegotheles savesi</i>        | 34.41 | CR | 6.34 |
| <i>Gymnogyps californianus</i>  | 33.39 | CR | 6.31 |
| <i>Rhynchotos jubatus</i>       | 55.38 | EN | 6.11 |
| <i>Fregata andrewsi</i>         | 22.68 | CR | 5.94 |
| <i>Houbaropsis bengalensis</i>  | 19.62 | CR | 5.78 |
| <i>Geronticus eremita</i>       | 19.14 | CR | 5.78 |
| <i>Strigops habroptila</i>      | 18.63 | CR | 5.79 |
| <i>Carporococcyx viridis</i>    | 18.01 | CR | 5.72 |
| <i>Fregetta maoriana</i>        | 17.77 | CR | 5.70 |
| <i>Didunculus strigirostris</i> | 16.41 | CR | 5.63 |
| <i>Psophia obscura</i>          | 16.06 | CR | 5.61 |
| <i>Calidris pygmaea</i>         | 15.97 | CR | 5.60 |
| <i>Heteroglaux blewiti</i>      | 15.66 | CR | 5.59 |
| <i>Hydrobates macrodactylus</i> | 12.91 | CR | 5.41 |

316 Testudines, crocodylians and squamates displayed separately. Only the 20 highest-ranking robust mammals are shown for

317 brevity. Complete list: S2 Dataset.

318

## 319 **Discussion**

320 Here, we have compared existing methods for imputing ED scores of species missing from a phylogeny  
321 with our novel method, finding that the new approach is substantially more accurate. We applied the  
322 new method to estimate ED scores for all tetrapods and, in conjunction with IUCN Red List data,  
323 updated EDGE prioritisation lists for amphibians, birds and mammals, and developed the first EDGE  
324 prioritisation for reptiles. Finally, we identified species with robust ED and EDGE scores, and thus  
325 present a practical tool for incorporating missing species to produce robust conservation prioritisations  
326 in an EDGE framework.

## 327 **Imputation of Evolutionary Distinctiveness for missing species**

328 The rate of species descriptions means species-level phylogenies already omit new species and  
329 reclassifications by the time they reach publication. For example, the squamate phylogeny of Tonini et  
330 al. [35] contained 9,754 squamates, in accordance with the March 2015 update of the Reptile Database  
331 [54]. However, this phylogeny already omitted 446 species described between March 2015 and its  
332 publication online in April 2016 [54]. Thus, even by combining limited genetic coverage with  
333 taxonomic data [35,40,48], the rate of species descriptions—particularly in amphibians and  
334 squamates—means that the imputation of ED scores remains necessary to incorporate all species into  
335 PD-based conservation prioritisation methods.

336 Our novel imputation method can accurately estimate the ED of missing species for phylogenetically-  
337 informed conservation prioritisation. Though the two imputation methods previously used in analyses  
338 of ED [12,19,36] also performed well in predicting ED of missing species, the method adopted here  
339 returns values closer to the reference ED score, particularly when higher numbers of species are missing  
340 from phylogenies (Fig 1). Further, the new imputation method both increases the total ED, or PD, of  
341 the clade while reducing the individual ED scores of the closest relatives to the missing species. This  
342 more accurately reflects what happens to ED scores when new species are added to a phylogeny than  
343 in either of the earlier methods.

344 Further, our analysis of the squamate phylogeny shows that the imputed scores are similar to those  
345 obtained from more complete phylogenies published after the imputation was carried out. Of the top

346 50 EDGE squamate species obtained using the newer Tonini et al. distribution of phylogenies [35], we  
347 successfully captured 44 species in the top 100 EDGE ranks by imputing ED scores from the incomplete  
348 Zheng and Wiens phylogeny [52]. The phylogenies of Zheng and Wiens [52] and Tonini et al. [35]  
349 share much of the same genetic and fossil calibration data, thus are not independent.

350 Nonetheless, the strong concordance of highly ranked species when using imputed versus directly  
351 calculated ED indicates that our method can correctly identify a large proportion of the highest ranked  
352 EDGE species without needing to wait for new phylogenies to be published. As phylogenies are  
353 generally updated with incremental increases in genetic coverage (rather than new genetic data for  
354 thousands of species at a time), we anticipate that imputing from the most recent phylogeny will remain  
355 an accurate method for prioritising species for conservation action. Our results therefore demonstrate  
356 the feasibility of imputing ED scores to identify phylogenetic conservation priorities without the need  
357 for creating or updating large distributions of species-level phylogenies, which requires expertise and  
358 resources not often available to applied conservation programmes.

## 359 **Identifying phylogenetic conservation priorities in the face of** 360 **uncertainty**

361 We provide here the first estimation of ED across all tetrapods, and the first EDGE prioritisation of all  
362 tetrapods with non-Data Deficient IUCN Red List assessments. With the publication of Tonini et al.'s  
363 [35] species-level phylogeny, there is now extensive phylogenetic coverage for squamates similar to  
364 that of mammals [38,49,50], birds [15,48] and crocodylians [55] with which we underpin our analysis.  
365 However, as testudines and amphibians suffer from poor phylogenetic coverage [41,42], our scores for  
366 these clades are considered less certain. The publication of new species-level phylogenies for testudines  
367 and amphibians will provide further data against which our imputation method can be tested and refined.  
368 However, such phylogenies will likely omit newly described species for which ED must be imputed.

369 Our EDGE rankings for reptiles reflect the high ED and imperilment of the world's testudines [60],  
370 with turtles and tortoises comprising 29 of the top 100 EDGE reptiles despite representing only 3.3%  
371 of reptilian species richness. EDGE rankings for reptiles are limited in coverage by the paucity of IUCN  
372 Red List assessments for the group; reptiles lag behind other tetrapod groups in extinction risk

373 assessment, with non-Data Deficient assessments available for less than 45% of species [6,61]. Thus,  
374 as Red List assessment coverage for reptiles increases, it is likely a number of high ED species lacking  
375 assessments will enter the top 100 EDGE ranks [35].

376 EDGE prioritisations already existed for amphibians, birds and mammals [15,19,30], but were out-of-  
377 date in terms of both taxonomic revisions and Red List assessments. There are 26 changes to the top  
378 100 EDGE mammal species compared to Collen et al. [19]. Species for which ED was imputed from  
379 relatives in the phylogeny comprise 21 of the top 100 ranks, 12 of which are robust priority species  
380 under our criteria. There are 19 changes to the top 100 EDGE birds since Jetz et al. [15], four of which  
381 are due to the uplisting of species on the IUCN Red List, and 15 of which are due to taxonomic revisions  
382 [15,59]. When compared to the previous EDGE amphibian list [30], only 37 of the top 100 EDGE  
383 amphibians are retained.

384 The first reason for this change is that our updated list used a 2014 genetic phylogeny [41] from which  
385 we estimated our ED scores for amphibians, rather than the earlier taxonomic phylogeny developed for  
386 the original EDGE amphibian analysis [30]. The difference in phylogenies produced different ED scores  
387 for amphibians compared to the original EDGE amphibian list due to the inference of differing  
388 phylogenetic relationships. The second reason is that the description in the intervening period of more  
389 than 1,400 species between the original EDGE amphibian list and the one presented here has resulted  
390 in both the reduction of ED for many species following the addition of congeners and confamilials, and  
391 resulted in the identification of priority species unknown to science at the time of the original EDGE  
392 list (e.g. *Leptotalax botsfordi*, described 2013 [62]).

393 Notable patterns in the priority EDGE species presented here reflect imminent threats facing certain  
394 regions or clades. For example, 47 of the top 100 EDGE amphibians are from Central and South  
395 America (compared to 55 of the top 100 in the original amphibian EDGE list [30]), reflecting the  
396 continuing severe population declines across the region [63–65]. New top 100 EDGE birds include  
397 species now threatened by trade, hunting and persecution: two vulture species (Hooded Vulture

398 *Necrosyrtes monachus*, White-headed Vulture *Trigonoceps occipitalis*) [66–68], the Javan Green  
399 Magpie (*Cissa thalassina*) [69,70] and the Helmeted Hornbill (*Rhinoplax vigil*) [71,72].

400 Our updated mammal rankings capture the continued decline of Madagascar biodiversity [10,73–75],  
401 now accounting for 19 of the top 100 EDGE mammals—more than twice as many species as in Collen  
402 et al. [19]. 15 of the 19 Madagascar priority mammals are lemurs, nine of which were not previously  
403 present in the top 100. Of the nine lemur species, five entered the list as a result of uplisting on the  
404 IUCN Red List, and four were only recently described, reflecting the high description rate of threatened  
405 lemur species [6,76,77].

406 The number of robust priority EDGE mammals identified is much greater than any other clade, which  
407 is indicative of the comparatively much higher genetic coverage. The mammalian phylogeny differs  
408 from those used to calculate EDGE scores of birds and squamates in that it comprises only species with  
409 genetic data, thus the level of uncertainty across the distribution is significantly lower[49,51].

410 In contrast, the identification of relatively few robust EDGE squamates (seven of 69 in top 100; Table  
411 3) and birds (15), reflects the broad range of ED scores calculated from the Tonini et al. [35] distribution  
412 of phylogenies. Distributions of phylogenies are created to capture phylogenetic uncertainty and  
413 compensate for the inclusion of species with no genetic data. Thus, the small numbers of robust EDGE  
414 priorities are likely a conservative estimate. Encouragingly, all seven robust EDGE priority squamate  
415 species were identified as top 100 EDGE species using our imputed ED scores from the phylogeny of  
416 Zheng and Wiens [52]. Further, the establishment of EDGE scores for reptiles through imputation has  
417 facilitated additional conservation action for two priority EDGE reptiles (the Round Island keel-scaled  
418 boa, *Casarea dussumieri* and the West African slender-snouted crocodile *Mecistops cataphractus*) [37],  
419 both of which were identified as robust priorities. This highlights the utility of developing tools to  
420 initiate conservation action using immediately available data, rather than waiting for more complete  
421 phylogenies, which is unrealistic or impossible for the majority of clades.

422 Under the criteria for identifying robust species when only a single, incomplete phylogeny is available,  
423 10 testudines and two crocodiles are considered robust priority EDGE species, with their entire genus

424 or family being present in their respective phylogeny (Table 3) [42,55]. We consider 14 of the top 100  
425 EDGE amphibians to be robust priority species. Though this is a small proportion of the top 100, seven  
426 of the 14 are monotypic genera and the other half are from small genera (2-4 spp.). The more speciose  
427 genera and families typically have species missing from the phylogeny—thus precluding species from  
428 meeting the robust criteria.

429 In conclusion, we have demonstrated that our new statistical imputation method outperforms earlier  
430 approaches, and we have used this method to create updated EDGE lists for all tetrapods, including the  
431 first ever EDGE list for reptiles. As a result, we have improved our ability to keep prioritisation rankings  
432 synchronised with advances in phylogenetic knowledge and can be confident that we are focusing  
433 conservation attention on robust and high-ranking EDGE species. This methodology opens  
434 opportunities to assess and prioritise new taxonomic groups, paving the way for conservation efforts on  
435 more neglected clades, before even more unique evolutionary history is lost forever.

436

## 437 **Acknowledgments**

438 Thank you to Dave Redding and James Rosindell for helpful suggestions regarding our analyses. We  
439 thank Rachel Williams and Anthony Lowney for their useful comments and discussion. We are  
440 grateful to Jonathan Baillie, founder of the EDGE of Existence Programme, for his encouragement  
441 and support. A special thank you to the EDGE Fellows working around the world, who meaningfully  
442 put our prioritisations into practice through their conservation of EDGE species.

## 443 **References**

- 444 1. Ceballos G, Ehrlich PR, Barnosky AD, García A, Pringle RM, Palmer TM. Accelerated  
445 modern human – induced species losses: entering the sixth mass extinction. *Sci Adv.* 2015;1:  
446 1–5. doi:10.1126/sciadv.1400253
- 447 2. Secretariat of the Convention on Biological Diversity. *Global Biodiversity Outlook 2.* 2006.  
448 doi:10.1093/aje/kwq338
- 449 3. Brooks TM, A MR, Da Fonseca GAB, Gerlach J, Hoffmann M, Lamoreux JF, et al. Global  
450 Biodiversity Conservation Priorities. *Science.* 2006;313: 58–61. doi:10.1126/science.1127609
- 451 4. Li B V., Pimm SL. China’s endemic vertebrates sheltering under the protective umbrella of the  
452 giant panda. *Conserv Biol.* 2016;30: 329–339. doi:10.1111/cobi.12618
- 453 5. Marshall AJ, Meijaard E, Van Cleave E, Sheil D. Charisma counts: The presence of great apes  
454 affects the allocation of research effort in the paleotropics. *Front Ecol Environ.* 2016;14: 13–  
455 19. doi:10.1002/14-0195.1
- 456 6. IUCN. IUCN Red List of Threatened Species. Version 2016-3 [Internet]. 2016. Available:  
457 [www.iucnredlist.org](http://www.iucnredlist.org)
- 458 7. Chavanich S, Soong K, Zvuloni A, Rinkevich B, Alino P. Conservation, management, and  
459 restoration of coral reefs. *Zoology.* Elsevier GmbH.; 2015;118: 132–134.  
460 doi:10.1016/j.zool.2015.01.002
- 461 8. Joseph LN, Maloney RF, Possingham HP. Optimal Allocation of Resources among Threatened  
462 Species: a Project Prioritization Protocol. *Conserv Biol.* 2009;23: 328–338.  
463 doi:10.1111/j.1523-1739.2008.01124.x
- 464 9. Dickman AJ, Hinks AE, Macdonald EA, Burnham D, Macdonald DW. Priorities for global  
465 felid conservation. *Conserv Biol.* 2015;29: 854–864. doi:10.1111/cobi.12494
- 466 10. Myers N, Mittermeier RA, Mittermeier CG, da Fonseca GAB, Kent J. Biodiversity hotspots



- 467 for conservation priorities. *Nature*. 2000;403: 853–858. doi:10.1038/35002501
- 468 11. Stattersfield A, Long A, Wege D. *Endemic Birds of the World: Properties for Biodiversity*  
469 *Conservation*. BirdLife International; 1998.
- 470 12. Isaac NJB, Turvey ST, Collen B, Waterman C, Baillie JEM. *Mammals on the EDGE:*  
471 *Conservation priorities based on threat and phylogeny*. *PLoS One*. 2007;2.  
472 doi:10.1371/journal.pone.0000296
- 473 13. Sitas N, Baillie JEM, Isaac NJB. What are we saving? Developing a standardized approach for  
474 conservation action. *Anim Conserv*. 2009;12: 231–237. doi:10.1111/j.1469-  
475 1795.2009.00244.x
- 476 14. Safi K, Armour-Marshall K, Baillie JEM, Isaac NJB. Global Patterns of Evolutionary Distinct  
477 and Globally Endangered Amphibians and Mammals. *PLoS One*. 2013;8.  
478 doi:10.1371/journal.pone.0063582
- 479 15. Jetz W, Thomas GH, Joy JB, Redding DW, Hartmann K, Mooers AO. Global Distribution and  
480 Conservation of Evolutionary Distinctness in Birds. *Curr Biol*. The Authors; 2014;24: 919–  
481 930. doi:10.1016/j.cub.2014.03.011
- 482 16. Redding DW, Dewolff C V., Mooers A. Evolutionary distinctiveness, threat status, and  
483 ecological oddity in primates. *Conserv Biol*. 2010;24: 1052–1058. doi:10.1111/j.1523-  
484 1739.2010.01532.x
- 485 17. Redding DW, Mooers AO. Ranking mammal species for conservation and the loss of both  
486 phylogenetic and trait diversity. *PLoS One*. 2015;10: 1–11. doi:10.1371/journal.pone.0141435
- 487 18. Mouillot D, Parravicini V, Bellwood DR, Leprieur F, Huang D, Cowman PF, et al. Global  
488 marine protected areas do not secure the evolutionary history of tropical corals and fishes. *Nat*  
489 *Commun*. Nature Publishing Group; 2016;7: 10359. doi:10.1038/ncomms10359
- 490 19. Collen B, Turvey ST, Waterman C, Meredith HMR, Kuhn TS, Baillie JEM, et al. Investing in

- 491 evolutionary history: implementing a phylogenetic approach for mammal conservation. *Philos*  
492 *Trans R Soc Lond B Biol Sci.* 2011;366: 2611–2622. doi:10.1098/rstb.2011.0109
- 493 20. Steel M, Mimoto A, Mooers A. Hedging our bets: The expected contribution of species to  
494 future phylogenetic diversity. *Evol Bioinforma.* 2007;3: 237–244. doi:10.1111/j.1461-  
495 0248.2005.00752.x
- 496 21. Rosauer D, Laffan SW, Crisp MD, Donnellan SC, Cook LG. Phylogenetic endemism: A new  
497 approach for identifying geographical concentrations of evolutionary history. *Mol Ecol.*  
498 2009;18: 4061–4072. doi:10.1111/j.1365-294X.2009.04311.x
- 499 22. Nunes LA, Turvey ST, Rosindell J. The price of conserving avian phylogenetic diversity: a  
500 global prioritization approach. *Philos Trans R Soc L B Biol Sci.* 2015;370: 20140004.  
501 doi:10.1098/rstb.2014.0004
- 502 23. Pearse WD, Chase MW, Crawley MJ, Dolphin K, Fay MF, Joseph JA, et al. Beyond the  
503 EDGE with EDAM: Prioritising british plant species according to evolutionary distinctiveness,  
504 and accuracy and magnitude of decline. *PLoS One.* 2015;10.  
505 doi:10.1371/journal.pone.0126524
- 506 24. Pavoine S. Is the originality of a species measurable? *Ecol Lett.* 2005;8: 579–586.  
507 doi:10.1111/j.1461-0248.2005.00752.x
- 508 25. Steel M. Phylogenetic diversity and the greedy algorithm. *Syst Biol.* 2005;54: 527–529.  
509 doi:10.1080/10635150590947023
- 510 26. Redding DW, Mooers AO. Incorporating evolutionary measures into conservation  
511 prioritization. *Conserv Biol.* 2006;20: 1670–1678. doi:10.1111/j.1523-1739.2006.00555.x
- 512 27. Redding DW, Mazel F, Mooers A. Measuring evolutionary isolation for conservation. *PLoS*  
513 *One.* 2014;9: 1–15. doi:10.1371/journal.pone.0113490
- 514 28. Faith DP. Phylogenetic diversity, functional trait diversity and extinction: avoiding tipping

- 515 points and worst-case losses. *Philos Trans R Soc Lond B Biol Sci.* 2015;370: 200140011.  
516 doi:10.1098/rstb.2014.0011
- 517 29. Veron S, Davies TJ, Cadotte MW, Clergeau P, Pavoine S. Predicting loss of evolutionary  
518 history: Where are we? *Biol Rev.* 2015; doi:10.1111/brv.12228
- 519 30. Isaac NJB, Redding DW, Meredith HM, Safi K. Phylogenetically-Informed Priorities for  
520 Amphibian Conservation. *PLoS One.* 2012;7: 1–8. doi:10.1371/journal.pone.0043912
- 521 31. Frishkoff LO, Karp DS, M’Gonigle LK, Mendenhall CD, Zook J, Kremen C, et al. Loss of  
522 avian phylogenetic diversity in neotropical agricultural systems. *Science.* 2014;345: 1343–  
523 1346. doi:10.7910/DVN/26910
- 524 32. Magnuson-Ford K, Ingram T, Redding DW, Mooers A. Rockfish (*Sebastes*) that are  
525 evolutionarily isolated are also large, morphologically distinctive and vulnerable to  
526 overfishing. *Biol Conserv.* 2009;142: 1787–1796. doi:10.1016/j.biocon.2009.03.020
- 527 33. Huang S, Drake JM, Gittleman JL, Altizer S. Parasite diversity declines with host evolutionary  
528 distinctiveness: A global analysis of carnivores. *Evolution.* 2015;69: 621–630.  
529 doi:10.1111/evo.12611
- 530 34. Marin J, Hedges SB. Time best explains global variation in species richness of amphibians,  
531 birds and mammals. *J Biogeogr.* 2016;43: 1069–1079. doi:10.1111/jbi.12709
- 532 35. Tonini JFR, Beard KH, Ferreira RB, Jetz W, Pyron RA. Fully-sampled phylogenies of  
533 squamates reveal evolutionary patterns in threat status. *Biol Conserv.* Elsevier Ltd; 2015;  
534 doi:10.1016/j.biocon.2016.03.039
- 535 36. Curnick DJ, Head CEI, Huang D, Crabbe MJC, Gollock M, Hoeksema BW, et al. Setting  
536 evolutionary-based conservation priorities for a phylogenetically data-poor taxonomic group  
537 (*Scleractinia*). *Anim Conserv.* 2015;18: 303–312. doi:10.1111/acv.12185
- 538 37. EDGE of Existence. EDGE of Existence [Internet]. 2017 [cited 1 Jun 2016]. Available:

539 <http://edgeofexistence.org/>

540 38. Bininda-Emonds ORP, Cardillo M, Jones KE, Macphee RDE, Beck RMD, Grenyer R, et al.

541 The delayed rise of present-day mammals. *Nature*. 2007;446: 507–512.

542 doi:10.1038/nature05634

543 39. Swenson NG. Phylogenetic imputation of plant functional trait databases. *Ecography (Cop)*.

544 2014;37: 105–110. doi:10.1111/j.1600-0587.2013.00528.x

545 40. Thomas GH, Hartmann K, Jetz W, Joy JB, Mimoto A, Mooers AO. PASTIS: An R package to

546 facilitate phylogenetic assembly with soft taxonomic inferences. *Methods Ecol Evol*. 2013;4:

547 1011–1017. doi:10.1111/2041-210X.12117

548 41. Pyron RA. Biogeographic analysis reveals ancient continental vicariance and recent oceanic

549 dispersal in amphibians. *Syst Biol*. 2014;63: 779–797. doi:10.1093/sysbio/syu042

550 42. Hedges SB, Marin J, Suleski M, Paymer M, Kumar S. Tree of life reveals clock-like speciation

551 and diversification. *Mol Biol Evol*. 2015;32: 835–845. doi:10.1093/molbev/msv037

552 43. Guillon JM, Guéry L, Hulin V, Girondot M. A large phylogeny of turtles (Testudines) using

553 molecular data. *Contrib to Zool*. 2012;81: 147–158.

554 44. Jaffe AL, Slater GJ, Alfaro ME. The evolution of island gigantism and body size variation in

555 tortoises and turtles. *Biol Lett*. 2011;7: 558–561. doi:10.1098/rsbl.2010.1084

556 45. Clucas B, McHugh K, Caro T. Flagship species on covers of US conservation and nature

557 magazines. *Biodivers Conserv*. 2008;17: 1517–1528. doi:10.1007/s10531-008-9361-0

558 46. Seddon PJ, Soorae PS, Launay F. Taxonomic bias in reintroduction projects. *Anim Conserv*.

559 2005;8: 51–58. doi:10.1017/S1367943004001799

560 47. Clark JA, May RM. Taxonomic Bias in Conservation Research. *Science*. 2002;297: 191–192.

561 Available: <http://science.sciencemag.org/content/297/5579/191.2.abstract>

- 562 48. Jetz W, Thomas GH, Joy JB, Hartmann K, Mooers AO. The global diversity of birds in space  
563 and time. *Nature*. 2012;491: 444–448. doi:10.1038/nature11631
- 564 49. Fritz SA, Bininda-Emonds ORP, Purvis A. Geographical variation in predictors of mammalian  
565 extinction risk: Big is bad, but only in the tropics. *Ecol Lett*. 2009;12: 538–549.  
566 doi:10.1111/j.1461-0248.2009.01307.x
- 567 50. Faurby S, Svenning JC. A species-level phylogeny of all extant and late Quaternary extinct  
568 mammals using a novel heuristic-hierarchical Bayesian approach. *Mol Phylogenet Evol*.  
569 2015;84: 14–26. doi:10.1016/j.ympev.2014.11.001
- 570 51. Rabosky DL. No substitute for real data: A cautionary note on the use of phylogenies from  
571 birth-death polytomy resolvers for downstream comparative analyses. *Evolution*. 2015;69:  
572 3207–3216. doi:10.1111/evo.12817
- 573 52. Zheng Y, Wiens JJ. Combining phylogenomic and supermatrix approaches, and a time-  
574 calibrated phylogeny for squamate reptiles (lizards and snakes) based on 52 genes and 4162  
575 species. *Mol Phylogenet Evol*. Elsevier Inc.; 2016;94: 537–547.  
576 doi:10.1016/j.ympev.2015.10.009
- 577 53. Prum RO, Berv JS, Dornburg A, Field DJ, Townsend JP, Moriarty Lemmon E, et al. A  
578 comprehensive phylogeny of birds (Aves) using targeted next-generation DNA sequencing.  
579 *Nature*. 2015;526: 569–573. doi:10.1038/nature15697
- 580 54. Uetz P, Freed P, Hosek J. The Reptile Database [Internet]. 2016 [cited 15 Apr 2016].  
581 Available: <http://www.reptile-database.org>
- 582 55. Shirley MH, Vliet K a, Carr AN, Austin JD. Rigorous approaches to species delimitation have  
583 significant implications for African crocodylian systematics and conservation. *Proc R Soc B*.  
584 2014;281: 20132483. doi:10.1098/rspb.2013.2483
- 585 56. Frost DR. Amphibian Species of the World: an Online Reference. Version 6.0. In: American

- 586 Museum of Natural History, New York, USA. [Internet]. [cited 1 Feb 2016]. Available:  
587 <http://research.amnh.org/herpetology/amphibia/index.html>
- 588 57. Kuhn TS, Mooers A, Thomas GH. A simple polytomy resolver for dated phylogenies.  
589 *Methods Ecol Evol.* 2011;2: 427–436. doi:10.1111/j.2041-210X.2011.00103.x
- 590 58. Wilson DE, Reeder DM. *Mammal species of the world: a taxonomic and geographic reference.*  
591 JHU Press; 2005.
- 592 59. BirdLife. BirdLife Taxonomic Checklist 8.0 [Internet]. 2017 [cited 1 Jun 2016]. Available:  
593 <http://datazone.birdlife.org/species/taxonomy>
- 594 60. van Dijk PP, Iverson JB, Rhodin AGJ, Shaffer HB, Bour R. *Turtles of the World, 7th Edition:*  
595 *Annotated Checklist of Taxonomy, Synonymy, Distribution with Maps, and Conservation*  
596 *Status. Conserv Biol Freshw Turtles Tortoises.* 2014;5: 243–328.  
597 doi:10.3854/crm.5.000.checklist.v7.2014
- 598 61. Meiri S, Chapple DG. Biases in the current knowledge of threat status in lizards, and bridging  
599 the ???assessment gap??? *Biol Conserv.* Elsevier Ltd; 2016;204: 6–15.  
600 doi:10.1016/j.biocon.2016.03.009
- 601 62. ROWLEY JLL, DAU VQ, NGUYEN TT. A new species of *Leptolalax* (Anura:  
602 *Megophryidae*) from the highest mountain in Indochina. *Zootaxa.* 2013;3737: 415.  
603 doi:10.11646/zootaxa.3737.4.5
- 604 63. Young BE, Lips KR, Reaser JK, Ibáñez R, Antonio W, Cedeño JR, et al. Population Declines  
605 and Priorities for Amphibian Conservation in Latin America. *Conserv Biol.* 2001;15: 1213–  
606 1223. doi:10.1046/j.1523-1739.2001.00218.x
- 607 64. Lips KR et al. Amphibian Population Declines in Latin America: A Synthesis1. *Biotropica.*  
608 2005;37: 222–226. doi:10.1111/j.1744-7429.2005.00029.x
- 609 65. Whitfield SM, Lips KR, Donnelly. Amphibian decline and conservation in Central America.

- 610 Copeia. 2016; 1–30. doi:10.1643/CH-15-300
- 611 66. Oaks JL, Gilbert M, Virani MZ, Watson RT, Meteyer CU, Rideout B a, et al. Diclofenac  
612 residues as the cause of vulture population decline in Pakistan. *Nature*. 2004;427: 630–633.  
613 doi:10.1038/nature02317
- 614 67. Ogada D, Shaw P, Beyers RL, Buij R, Murn C, Thiollay JM, et al. Another Continental  
615 Vulture Crisis: Africa’s Vultures Collapsing toward Extinction. *Conserv Lett*. 2016;9: 89–97.  
616 doi:10.1111/conl.12182
- 617 68. Poole C, Prakash V, Round A, Timmins R. Causes in Effects of Declines Temporospacial of  
618 Gyps Vultures. *Conserv Biol*. 2003;17: 661–671. doi:10.1046/j.1523-1739.2003.01740.x
- 619 69. Iqbal M. Looking at online bird trading in Indonesia; a case study from South Sumatra.  
620 *BirdingASIA*. 2015;24: 132–135.
- 621 70. van Balen SB, EATON JA, RHEINDT FE. Biology, taxonomy and conservation status of the  
622 Short-tailed Green Magpie *Cissa [t.] thalassina* from Java. *Bird Conserv Int*. 2011;23: 91–109.  
623 doi:10.1017/S0959270911000360
- 624 71. Collar NJ. Helmeted Hornbills *Rhinoplax vigil* and the ivory trade : the crisis that came out of  
625 nowhere. *BirdingASIA*. 2015;24: 12–17.
- 626 72. Beastall C, Shepherd CR, Hadiprakarsa Y, Martyr D. Trade in the Helmeted Hornbill  
627 *Rhinoplax vigil*: the “ivory hornbill.” *Bird Conserv Int*. 2016;26: 137–146.  
628 doi:10.1017/S0959270916000010
- 629 73. Ganzhorn JU, Lowry PP, Schatz GE, Sommer S. The biodiversity of Madagascar: One of the  
630 world’s hottest hotspots on its way out. *Oryx*. 2001;35: 346–348. doi:10.1046/j.1365-  
631 3008.2001.00201.x
- 632 74. Vieites DR, Wollenberg KC, Andreone F, Köhler J, Glaw F, Vences M. Vast underestimation  
633 of Madagascar’s biodiversity evidenced by an integrative amphibian inventory. *Proc Natl*

- 634 Acad Sci U S A. 2009;106: 8267–8272. doi:10.1073/pnas.0810821106
- 635 75. Schwitzer C, Mittermeier RA, Johnson SE, Donati G, Irwin M, Peacock H, et al. Averting  
636 Lemur Extinctions amid Madagascar’s Political Crisis. *Science*. 2014;343: 842–843.
- 637 76. Hotaling S, Foley ME, Lawrence NM, Bocanegra J, Blanco MB, Rasoloarison R, et al. Species  
638 discovery and validation in a cryptic radiation of endangered primates: Coalescent-based  
639 species delimitation in Madagascar’s mouse lemurs. *Mol Ecol*. 2016;25: 2029–2045.  
640 doi:10.1111/mec.13604
- 641 77. Yoder AD, Rasoloarison RM, Goodman SM, Irwin JA, Atsalis S, Ravosa MJ, et al.  
642 Remarkable species diversity in Malagasy mouse lemurs (primates, *Microcebus*). *Proc Natl*  
643 *Acad Sci U S A*. 2000;97: 11325–30. doi:10.1073/pnas.200121897
- 644



645 **Figures**

646

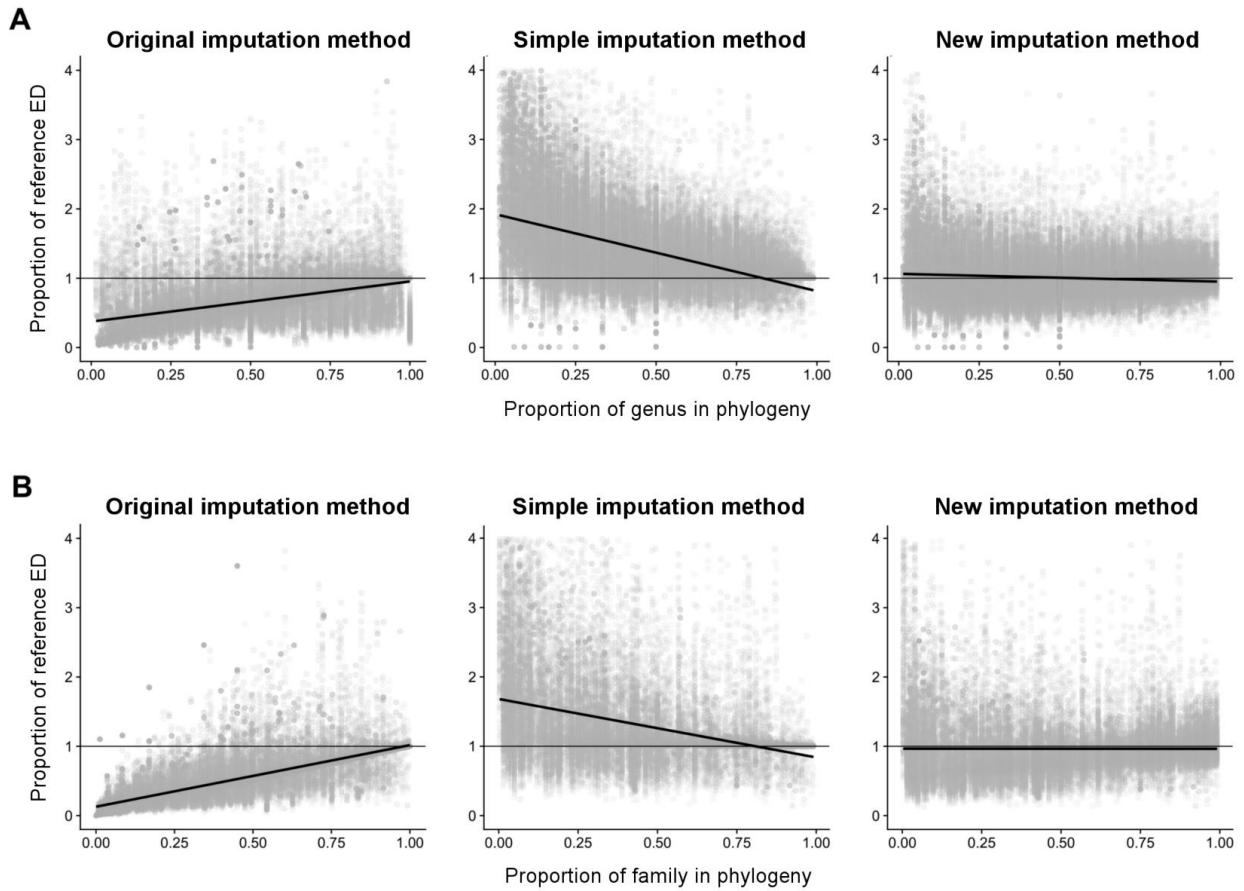

647

648 **Fig 1. Relative performance of the three ED imputation methods.**

649 Proportion of reference ED captured when ED is imputed from: (A) congeners and (B) confamilials for all phylogenies  
650 combined. Horizontal thin black line represents a line with an intercept of one (signifying 100% correspondence to original  
651 ED score), and a slope of zero (no change in proportion of reference ED predicted); the ideal performance of an imputation  
652 method. The thicker black line shows the modelled relationship between proportion of species removed and proportion of  
653 reference ED score estimated. Grey points represent one species from one iteration.

654

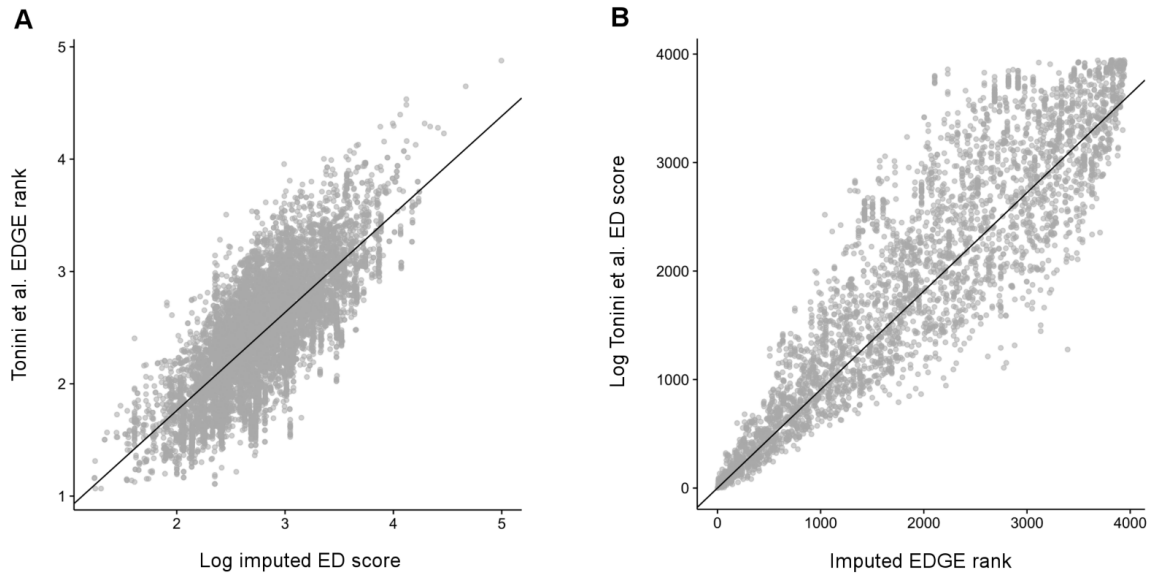

655

656 **Fig 2. Comparison of imputed squamate ED and EDGE scores with fully phylogeny-derived ED and EDGE scores.**

657 (A) ED scores for all squamates, imputed from the 4,161-species phylogeny of Zheng and Wiens [52] using our new imputation  
658 method, against the median ED scores from Tonini et al. [35]; (B) EDGE ranks for all squamates with non-Data Deficient Red  
659 List assessments, calculated from our imputed ED scores against EDGE ranks calculated from the median ED scores from  
660 Tonini et al. [35]. Solid black line in each plot shows modelled relationship.

661

662

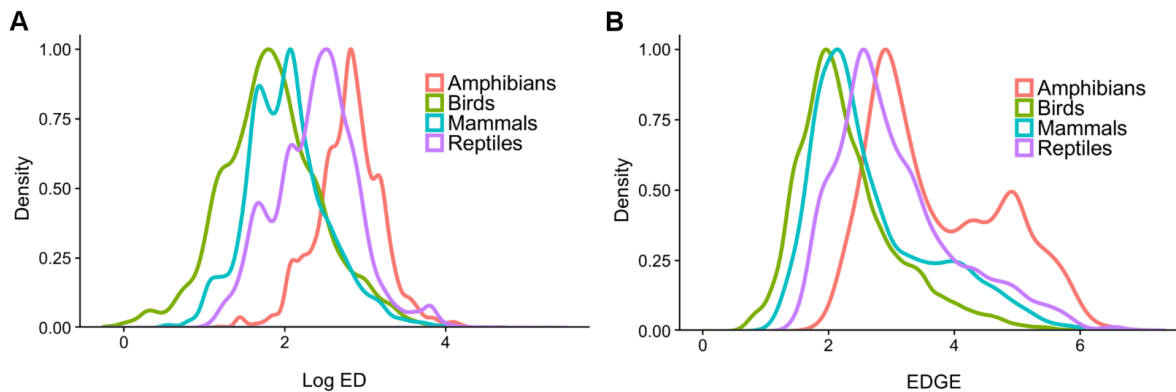

663

664 **Fig 3. The distribution of ED and EDGE across tetrapods.**

665 Density distributions, scaled to a maximum value of 1 for (A) ED for all tetrapods using available phylogenies and imputation  
666 and (B) EDGE for all tetrapods with IUCN Red List assessments.

667 **Supporting information**

668 **S1 Text. Examination of robust species assumption.**

669 **S2 Dataset. ED and EDGE scores.** The ED and EDGE scores for all amphibians, birds, mammals

670 and reptiles, and the robust priority species from each group.
